# Supplementary material
Source: HighWire-hosted journal article supplement (https://www.cmajopen.ca/highwire/filestream/89870/field_highwire_adjunct_files/0/open-2022-0092-original-submission.pdf)
Supplement: open-2022-0092-original-submission.pdf [file open-2022-0092-original-submission.pdf]

1  
2  
3  
4  
5  
6  
7  
8  
9  
10  
11  
12  
13  
14 Evaluating the impact of COVID19-related healthcare disruptions on pathologic cancer staging: a  
15 retrospective cohort study  
16  
17  
18  
19  
20

21 Christopher Tran MD MSc<sup>1,2</sup>, Lauren E. Cipriano PhD<sup>3,4</sup>, David K. Driman MBChB<sup>1,2</sup>

22  
23  
24  
25 <sup>1</sup>Department of Pathology and Laboratory Medicine, Western University

26  
27 <sup>2</sup>London Health Sciences Centre, London, Ontario, Canada

28  
29  
30 <sup>3</sup>Ivey Business School, Western University, London, Ontario,

31  
32  
33 <sup>4</sup>Department of Epidemiology and Biostatistics, Schulich School of Medicine & Dentistry, Western  
34 University  
35  
36  
37  
38  
39  
40

41 Corresponding Author: david.driman@lhsc.on.ca

42  
43 Funding: LE Cipriano is supported by a Canada Research Chair in Healthcare Analytics, Management,  
44 and Policy (CRC-950-233070).  
45  
46  
47

48 Competing Interests: None  
49

50  
51 Word Count: 2009  
52  
53  
54  
55  
56  
57  
58  
59  
60

## Abstract

Background: The COVID-19 pandemic has created significant disruptions in cancer care, with delays and reductions in diagnostic tests and treatments. We evaluated the impact of these healthcare-related changes on cancer staging, by comparing pathologically staged cancers before and during the pandemic.

Methods: We performed a retrospective cohort study at London Health Sciences Centre and St. Joseph's Healthcare, in London, Ontario. We evaluated all pathologically staged breast, colorectal, prostate, endometrial and lung cancers over a three-year period (March 15, 2018 to March 14, 2021). Cases were assigned to the pre-COVID group if the procedure was performed before March 15, 2020, or the COVID-period group with a procedure date on or after March 15, 2020. The primary outcome was cancer stage group, based on pathologic tumour, node, and metastasis (pTNM) stage. Univariate analyses were performed to compare demographic, pathologic features, and cancer stage group between pre-COVID and COVID-period cases. Multivariate ordinal regression analyses were performed for each cancer site, to evaluate whether cases staged during the COVID period were associated with a change in stage.

Results: There were 4 055 cases across the five cancer sites. Breast cancer staging procedures increased during the pandemic (41.3 vs 39.6 cases/30 days), while decreases were observed for endometrial (15.9 vs 16.4 cases/30 days), colorectal (21.8 vs 24.3 cases/30 days), prostate (13.6 vs 18.5 cases/30 days) and lung (11.5 vs 15.9 cases/30 days) cancers. For all cancer sites, there were no statistically significant differences in demographics, pathologic features, or cancer stage ( $p>0.05$ ). In the multivariate regression analysis, cases staged during the pandemic were not associated with greater stage for all cancer sites ( $p>0.05$ ).

Interpretation: Cases staged during the first COVID-19 pandemic year were not associated with greater stage, likely reflecting the prioritization of cancer procedures during times of reduced capacity.

## Introduction

Throughout the COVID-19 pandemic, healthcare systems across Canada have grappled with significant fluctuations in healthcare service delivery. Notably, the first wave in March-June 2020 strained hospital capacity and supplies; to conserve limited resources, management of patients with COVID-19 and urgent non-COVID-19 conditions was prioritized (1). This shift in resource allocation, in addition to changes in patient behaviour, resulted in decreased hospital admissions, emergency visits, and medical services (2). In Ontario, there has been a series of province-wide states of emergency related to COVID-19, creating further potential gaps in care (3).

In the continuum of cancer care, patients may require access to a variety of medical services including ambulatory clinics, imaging and laboratory testing, oncologic treatments and supportive care (4). Previous studies have shown reductions in cancer screening, testing, and treatment during the COVID-19 pandemic (5–9), while modelling studies have projected greater cancer-related deaths as a result of the gaps in care (10,11). Despite these projections, it is unclear whether healthcare disruptions resulted in a change in cancer stage and characteristics in the initial pandemic period. This study sought to compare the pathologic stage and features of cancers staged before (March 15, 2018-March 14, 2020) and during the first year of COVID-related interruptions in hospital services (March 15, 2020-March 14, 2021).

## Methods

### *Study Design and Data Collection*

We performed a retrospective cohort study at London Health Sciences Centre (LHSC) and St. Joseph's Health Care (SJHC), located in London, Ontario, Canada. LHSC and SJHC are part of a network of academic tertiary care hospitals serving Southwestern Ontario and are affiliated with Western

1  
2  
3 University. We reported this study in accordance with the Strengthening the Reporting of Observational  
4 Studies in Epidemiology (STROBE) guidelines (12).  
5  
6  
7

8 We first used our institutional cancer reporting data to identify the five most common cancers by  
9 site (excluding non-melanoma skin cancers), which included breast, colorectum, prostate, endometrium,  
10 and lung. Using our internal pathology database, we identified all cancer staging resections for these sites,  
11 performed over a three-year period (March 15, 2018 to March 14, 2021). We based the comparison  
12 groups on the surgery date; procedures performed before March 15, 2020 were included in the pre-  
13 COVID group, while the COVID-period group included all procedures performed on or after March 15,  
14 2020. We used this date specifically because it was the start of the first province-wide ramping down of  
15 elective surgeries and non-emergent activities (13).  
16  
17  
18  
19  
20  
21  
22  
23

24  
25 In Ontario, the pathological staging of primary cancers is reported using a standardized synoptic  
26 format, with mandatory reporting items established for different cancer sites. We used the pathology  
27 reports and electronic medical records to extract data for analysis, and all cases were deidentified using a  
28 unique study identifier. We used the pathological cancer stage group as the outcome variable, determined  
29 by the 8<sup>th</sup> edition of the American Joint Committee on Cancer Tumour/Node/Metastasis (pTNM) system  
30 (14). In cases where pathological staging was performed over multiple procedures, most commonly in  
31 breast cancers with separate sentinel lymph node sampling, we collated this information to determine the  
32 final stage group. We documented if the case was staged as a tumour recurrence, post-neoadjuvant  
33 therapy, or if there were multiple primary tumours. In the case of multiple primary tumours, the tumour  
34 with the most advanced stage was used for analysis.  
35  
36  
37  
38  
39  
40  
41  
42  
43  
44  
45

46  
47 For all cases, we collected demographic information including age and sex, as well as information  
48 regarding the specimen/procedure. For all primary cancers, we also extracted macroscopic and  
49 microscopic features that are included in the synoptic report but are not directly used for staging, with the  
50 variables specific to each cancer site. Generally, these features are used for risk stratification and may  
51 inform prognosis and/or guide treatment decisions. For breast and colorectal cancers, which have  
52  
53  
54  
55  
56  
57  
58  
59  
60

1  
2  
3 population-wide screening programs, we reviewed the electronic medical records to determine the clinical  
4 presentation and whether the malignancy was initially detected via screening.  
5  
6

### 7 8 *Statistical Analysis* 9

10 We computed descriptive and summary statistics for the cohort. To compare cancer cases staged  
11 before and during the COVID periods, we included only primary surgically treated cancers. Neoadjuvant-  
12 treated and recurrent cases were excluded for multiple reasons: the stage would not be an accurate  
13 reflection of the original disease; complete microscopic evaluation is often limited by posttreatment  
14 changes, particularly in cases with minimal or no residual tumour; and, the case would not be reflective of  
15 a primary staging procedure because patients with neoadjuvant treatment or recurrence would already be  
16 in the cancer treatment pathway. We also excluded prostate cancer cases identified in radical  
17 cystoprostatectomy specimens, as these were all performed for primary bladder malignancies.  
18  
19  
20  
21  
22  
23  
24  
25  
26

27  
28 We performed univariate analyses to compare patient demographics, cancer features, and stage.  
29 We used the Mann-Whitney test to evaluate differences in ordinal and continuous variables. For ordinal  
30 variables, if there were less than 10 observations in a category, we combined those cases with the next  
31 lowest or highest group. For binary and categorical variables, we used  $\chi^2$  or the Fisher exact test, with the  
32 latter being used if there were less than 10 observations in a category.  
33  
34  
35  
36  
37  
38

39 To evaluate whether there was a statistically significant shift in cancer stage during the COVID  
40 period, we performed a multivariate ordered logistic regression analysis using cancer stage as the  
41 outcome variable. For each regression analysis, the model included COVID-period status, demographic  
42 variables, and site-specific risk features. We excluded binary variables from the model if there were less  
43 than 10 observations in one of the groups. Odds ratios and 95% confidence intervals were calculated for  
44 all variables. The Brant test was used to test the proportional odds assumption (15), and general variance-  
45 inflation factors were used to check for multicollinearity. A 2-tailed P value of <0.05 was used to define  
46 statistical significance. All statistical analyses were performed using R v.4.1.1.  
47  
48  
49  
50  
51  
52  
53  
54  
55  
56  
57  
58  
59  
60

### *Ethics Approval*

Ethics approval was obtained from the Research Ethics Board at Western University and Lawson Health Research Institute (REB #119137).

### Results

The cohort comprised 4055 cancer cases across the five cancer sites (Table 1). In the one-year COVID period, there was an increase in breast cancer cases compared to yearly pre-COVID average (41.3 vs 39.6 cases per 30 days, increase 4.3%), while decreases were observed for endometrial (15.9 vs 16.4 cases per 30 days, decrease 3.0%), colorectal (21.8 vs 24.3 cases per 30 days, decrease 10.3%), prostate (13.6 vs 18.5 cases per 30 days, decrease 26.5%) and lung (11.5 vs 15.9 cases per 30 days, decrease 27.7%) cancers. The baseline patient demographics and procedures were similar between both groups. There was a greater rate of neoadjuvant-treated cases for lung cancers (6.4% vs 3.1%), prostate (17.6% vs 7.8%), colorectal (26.0% vs 22.3%) and breast (17.9% vs 16.1%) in the COVID period.

In the univariate analysis, there were no statistically significant differences in cancer stage distribution, high-risk features, or demographics (Tables 2-6). The results of the multivariate ordinal logistic regression for all cancer sites are provided in Table 7. Across all cancer sites, having been staged in the COVID period was not statistically associated with higher cancer stage at diagnosis, after controlling for patient and disease-specific factors.

### **Interpretation**

In our study, we evaluated the impact of the COVID-19-pandemic on cancer staging in a Canadian healthcare context. We did not find statistically significant differences in pathologic stage or high-risk features cancers staged in the first year of the COVID pandemic compared to those staged in the

1  
2  
3 two year per-pandemic period. In the first year of the pandemic, there was no evidence that surgically  
4 treated cancers were more advanced or aggressive.  
5  
6  
7

8 Our analysis included the five most commonly staged cancers, all with a variety of risk factors,  
9 pathophysiology, and clinical characteristics. Although we did not observe any statistically significant  
10 differences, our findings provide insight into cancer care patterns during the pandemic. Despite  
11 disturbances in healthcare service delivery, the number of breast and endometrial cancers cases were  
12 similar to the pre-pandemic period, while a modest decrease of 10.3% was observed for colorectal  
13 cancers. These findings reflect the prioritization of oncologic surgeries during the lockdown period (16),  
14 and are consistent with previous studies showing that oncologic surgery volumes were not as severely  
15 affected compared to other surgery types (7,17). Furthermore, the COVID period also included extended  
16 times with resumed clinical activity, allowing greater capacity to treat patients waiting for surgery.  
17 Although there were service reductions, particularly at the beginning of the pandemic, the number of  
18 surgically treated cases over the one-year period was maintained for breast and endometrial cancers.  
19  
20  
21  
22  
23  
24  
25  
26  
27  
28  
29  
30  
31

32 In contrast, there were markedly fewer staging procedures for prostate and lung cancers, likely  
33 because there are no population-wide screening programs for these cancers, and it is not uncommon for  
34 these patients to be asymptomatic at presentation (18–21). As a result, reductions in other types of clinical  
35 services may have limited opportunities to diagnose incident cases (2). Another possibility is that primary  
36 surgical staging may have been reduced for some cancers in favor of first-line drug or radiation therapy.  
37 During the pandemic, cancer treatment pathways have been modified, with triaging based on a  
38 combination of patient, disease, resource, and COVID-19-related risk factors (22), with variable impact.  
39 In another Canadian study, there was a significant decrease in lung cancer cases during the early  
40 pandemic period, along with a reduction in surgeries as the primary treatment modality (23). In our study,  
41 the greatest increase in neoadjuvant-treated cases during the COVID period was observed in prostate  
42 cancer.  
43  
44  
45  
46  
47  
48  
49  
50  
51  
52  
53  
54  
55  
56  
57  
58  
59  
60

1  
2  
3 For breast and colon cancers, we found that screening-detected cases were statistically significant  
4  
5 predictors of lower stage, highlighting the role of these screening programs in detecting early-stage  
6  
7 cancers. It is also important to emphasize the crucial role of screening in primary cancer prevention,  
8  
9 through the detection and removal of pre-malignant lesions. We previously described how our  
10  
11 institutional surgical pathology volumes changed during the first 4 months of the pandemic, with biopsy  
12  
13 volumes more severely affected compared to surgical resections (24). Given that premalignant lesions in  
14  
15 the breast and colon can take multiple years before progressing to cancer (25,26), the consequences from  
16  
17 changes in screening utilization may not be observable for several years.  
18  
19

20  
21 Cancer outcomes are not only influenced by stage, but are also affected by access to high quality  
22  
23 diagnostic tests and treatments (27,28). Our findings indicate that early efforts to prioritize newly  
24  
25 diagnosed cancer patients, even during significant strain on the health care system, appear to have  
26  
27 protected patients from disease progression related to delays in care. Variable reductions in staging  
28  
29 procedures were observed across different cancer sites, and it is important to elucidate whether this  
30  
31 represents reductions in diagnoses and/or treatment. As healthcare systems allocate resources under  
32  
33 continually changing conditions, addressing gaps in cancer care will be important to ensure that patients  
34  
35 receive fair and equitable access to healthcare services, and to optimize patient outcomes.  
36  
37  
38  
39  
40

#### 41 Limitations

42  
43

44 We used pathological staging data, which are based on the gross and microscopic examination of  
45  
46 tissues. Pathological stage may differ from clinical stage if there are findings on imaging that are not  
47  
48 assessed at the tissue level. Furthermore, some metastatic (stage IV) cancers may not be captured in our  
49  
50 data, as these patients often do not undergo surgery. However, given the similar rates of cases,  
51  
52 particularly for breast, colorectal and endometrial cancers, it is unlikely that a marked increase in  
53  
54 metastatic cases would have arisen in the first year of COVID.  
55  
56  
57  
58  
59  
60

1  
2  
3           There is likely regional variation in how cancer staging has changed during the COVID-19  
4  
5 pandemic, depending on local infection rates, resource availability, and government and hospital policy.  
6  
7 Temporal changes will also inevitably occur, as healthcare systems grapple with additional waves and  
8  
9 fluctuations in clinical activity. Nonetheless, our study provides a broad overview of cancer patterns  
10  
11 during the initial pandemic period and serves as valuable baseline data going forward.  
12  
13

14           Although we did not detect changes at the population level, there are no doubt individual patients  
15  
16 who have experienced clinically meaningful delays in accessing cancer services. For patients with cancer  
17  
18 during the pandemic, the healthcare changes and uncertainty have resulted in greater emotional and  
19  
20 mental stress (29–31). We focused on cancer stage as the primary outcome, but resource planning must  
21  
22 also include supportive treatments to address patient well-being, so that patients receive high-quality,  
23  
24 comprehensive cancer care.  
25  
26  
27  
28  
29  
30  
31  
32  
33  
34  
35  
36  
37  
38  
39  
40  
41  
42  
43  
44  
45  
46  
47  
48  
49  
50  
51  
52  
53  
54  
55  
56  
57  
58  
59  
60

## References

1. Government of Canada. COVID-19 pandemic guidance for the health care sector [Internet]. 2020 [cited 2021 Oct 27]. Available from: <https://www.canada.ca/en/public-health/services/diseases/2019-novel-coronavirus-infection/health-professionals/covid-19-pandemic-guidance-health-care-sector.html#a3>
2. Canadian Institute for Health Information. Overview: COVID-19's impact on health care systems | CIHI [Internet]. 2021 [cited 2021 Oct 27]. Available from: <https://www.cihi.ca/en/covid-19-resources/impact-of-covid-19-on-canadas-health-care-systems/overview-covid-19s-impact-on>
3. Berry I, Soucy JPR, Tuite A, Fisman D. Open access epidemiologic data and an interactive dashboard to monitor the COVID-19 outbreak in Canada. *CMAJ*. 2020 Apr 14;192(15):E420.
4. Gospodarowicz M, Trypuc J, D'Cruz A, Khader J, Omar S, Knaul F. Cancer Services and the Comprehensive Cancer Center. *Dis Control Priorities, Third Ed (Volume 3) Cancer* [Internet]. 2015 Nov 1 [cited 2021 Nov 16];195–210. Available from: <https://www.ncbi.nlm.nih.gov/books/NBK343637/>
5. Eskander A, Li Q, Hallet J, Coburn N, Hanna TP, Irish J, et al. Access to Cancer Surgery in a Universal Health Care System During the COVID-19 Pandemic. *JAMA Netw Open* [Internet]. 2021 Mar 1 [cited 2021 Nov 16];4(3):e211104–e211104. Available from: <https://jamanetwork.com/journals/jamanetworkopen/fullarticle/2777399>
6. Walker MJ, Meggetto O, Gao J, Espino-Hernández G, Jembere N, Bravo CA, et al. Measuring the impact of the COVID-19 pandemic on organized cancer screening and diagnostic follow-up care in Ontario, Canada: A provincial, population-based study. *Prev Med (Baltim)* [Internet]. 2021 Oct 1 [cited 2021 Nov 16];151:106586. Available from: <https://pubmed.ncbi.nlm.nih.gov/34217413/>
7. Wang J, Vahid S, Eberg M, Milroy S, Milkovich J, Wright FC, et al. Clearing the surgical backlog caused by COVID-19 in Ontario: a time series modelling study. *CMAJ* [Internet]. 2020 Nov 2 [cited 2020 Nov 25];192(44):E1347–56. Available from: [www.cmaj.ca/lookup/doi/10.1503/cmaj.201521/tab-related](http://www.cmaj.ca/lookup/doi/10.1503/cmaj.201521/tab-related)
8. Meggetto O, Jembere N, Gao J, Walker MJ, Rey M, Rabeneck L, et al. The impact of the COVID-19 pandemic on the Ontario Cervical Screening Program, colposcopy and treatment services in Ontario, Canada: a population-based study. 2021 Aug 1 [cited 2021 Nov 19];128(9):1503–10. Available from: <https://onlinelibrary.wiley.com/doi/full/10.1111/1471-0528.16741>
9. Decker KM, Lambert P, Feely A, Bucher O, Kim JO, Hebbard P, et al. Evaluating the impact of the covid-19 pandemic on new cancer diagnoses and oncology care in manitoba. *Curr Oncol* [Internet]. 2021 Aug 1 [cited 2021 Nov 19];28(4):3081–90. Available from: <https://www.mdpi.com/1718-7729/28/4/269/htm>
10. de Jonge L, Worthington J, van Wifferen F, Irigorri N, Peterse EFP, Lew J Bin, et al. Impact of the COVID-19 pandemic on faecal immunochemical test-based colorectal cancer screening programmes in Australia, Canada, and the Netherlands: a comparative modelling study. *Lancet Gastroenterol Hepatol* [Internet]. 2021 Apr 1 [cited 2021 May 11];6(4):304–14. Available from: [www.thelancet.com/gastrohep](http://www.thelancet.com/gastrohep)
11. Yong JHHE, Mainprize JG, Yaffe MJ, Ruan Y, Poirier AE, Coldman A, et al. The impact of episodic screening interruption: COVID-19 and population-based cancer screening in Canada. *J Med Screen* [Internet]. 2020 Nov 26 [cited 2021 Nov 19]; Available from: <https://journals.sagepub.com/doi/full/10.1177/0969141320974711>

12. Von Elm E, Altman DG, Egger M, Pocock SJ, Gøtzsche PC, Vandenbroucke JP. The Strengthening the Reporting of Observational Studies in Epidemiology (STROBE) Statement: Guidelines for reporting observational studies [Internet]. Vol. 85, Bulletin of the World Health Organization. Bull World Health Organ; 2007 [cited 2021 Oct 22]. p. 867–72. Available from: <https://pubmed.ncbi.nlm.nih.gov/18038077/>
13. Ontario Ministry of Health. Ramping Down Elective Surgeries and Other Non-Emergent Activities [Internet]. [cited 2021 Apr 7]. Available from: [https://www.health.gov.on.ca/en/pro/programs/publichealth/coronavirus/docs/memos/DM\\_OH\\_CMOH\\_memo\\_COVID19\\_elective\\_surgery\\_March\\_15\\_2020.pdf](https://www.health.gov.on.ca/en/pro/programs/publichealth/coronavirus/docs/memos/DM_OH_CMOH_memo_COVID19_elective_surgery_March_15_2020.pdf)
14. Amin MB, Edge S, Greene F, Byrd DR, Brookland RK, Washington MK, et al., editors. AJCC Cancer Staging Manual [Internet]. 8th ed. AJCC Cancer Staging Manual. 2017 [cited 2019 Dec 17]. 1032 p. Available from: <http://link.springer.com/10.1007/978-3-319-40618-3>
15. Brant R. Assessing Proportionality in the Proportional Odds Model for Ordinal Logistic Regression. *Biometrics*. 1990 Dec;46(4):1171.
16. A Measured Approach to Planning for Surgeries and Procedures During the COVID-19 Pandemic [Internet]. 2020 [cited 2021 Nov 19]. Available from: [https://www.ontariohealth.ca/sites/ontariohealth/files/2020-05/A Measured Approach to Planning for Surgeries and Procedures During the COVID-19 Pandemic.pdf](https://www.ontariohealth.ca/sites/ontariohealth/files/2020-05/A%20Measured%20Approach%20to%20Planning%20for%20Surgeries%20and%20Procedures%20During%20the%20COVID-19%20Pandemic.pdf)
17. Tran C, Kadour M, Cecchini MJ, Leslie KA, Driman DK. Using pathology data to evaluate surgical backlogs: considerations for resource planning. *CMAJ* [Internet]. 2021 Mar 8 [cited 2021 Oct 28];193(10):E343–E343. Available from: <https://www.cmaj.ca/content/193/10/E343>
18. Gabriela Lewin KM, James Dickinson, Neil Bell, Maria Bacchus H, Singh, Marcello Tonelli AJG. Recommendations on screening for lung cancer. *CMAJ* [Internet]. 2016 Apr 5 [cited 2021 Oct 22];188(6):425–32. Available from: <https://www.cmaj.ca/content/188/6/425>
19. Canadian Task Force on Preventive Health Care | Prostate Cancer (2014) [Internet]. [cited 2022 Jan 23]. Available from: <https://canadiantaskforce.ca/guidelines/published-guidelines/prostate-cancer/>
20. Etzioni R, Cha R, Feuer EJ, Davidov O. Asymptomatic Incidence and Duration of Prostate Cancer. 1998 [cited 2022 Jan 23];148(8). Available from: <https://academic.oup.com/aje/article/148/8/775/69278>
21. Quadrelli S, Lyons G, Colt H, Chimondeguy D, Buero A. Clinical Characteristics and Prognosis of Incidentally Detected Lung Cancers. *Int J Surg Oncol* [Internet]. 2015 Jan 5 [cited 2022 Jan 23];2015. Available from: <https://pubmed.ncbi.nlm.nih.gov/25811111/>
22. Ontario Health - Cancer Care Ontario. COVID-19 Supplemental Clinical Guidance for Patients with Cancer [Internet]. 2020 [cited 2021 Nov 12]. Available from: <https://www.asccp.org/covid-19>
23. Kasymjanova G, Anwar A, Cohen V, Sultanem K, Pepe C, Sakr L, et al. The Impact of COVID-19 on the Diagnosis and Treatment of Lung Cancer at a Canadian Academic Center: A Retrospective Chart Review. *Curr Oncol* [Internet]. 2021 Oct 20 [cited 2021 Nov 19];28(6):4247–55. Available from: <https://www.mdpi.com/1718-7729/28/6/360/htm>
24. Tran C, Kadour M, Cecchini MJ, Leslie KA, Driman DK. Using pathology data to evaluate surgical backlogs: considerations for resource planning. *CMAJ* [Internet]. 2021 Mar 8 [cited 2021 Oct 21];193(10):E343–E343. Available from: <https://www.cmaj.ca/content/193/10/E343>

- 1  
2  
3 25. Chen CD, Yen MF, Wang WM, Wong JM, Chen THH. A case-cohort study for the disease  
4 natural history of adenoma-carcinoma and de novo carcinoma and surveillance of colon and  
5 rectum after polypectomy: implication for efficacy of colonoscopy. *Br J Cancer* 2003 8812  
6 [Internet]. 2003 Jun 10 [cited 2022 Jan 23];88(12):1866-73. Available from:  
7 <https://www.nature.com/articles/6601007>  
8
- 9 26. Kopans DB, Rafferty E, Georgian-Smith D, Yeh E, D'Alessandro H, Moore R, et al. A simple  
10 model of breast carcinoma growth may provide explanations for observations of apparently  
11 complex phenomena. *Cancer* [Internet]. 2003 Jun 15 [cited 2021 Oct 22];97(12):2951-9.  
12 Available from: <https://pubmed.ncbi.nlm.nih.gov/12784329/>  
13
- 14 27. Dabbikeh A, Peng Y, Mackillop WJ, Booth CM, Zhang-Salomons J. Temporal trends in the  
15 association between socioeconomic status and cancer survival in Ontario: a population-based  
16 retrospective study. *Can Med Assoc Open Access J* [Internet]. 2017 Sep 6 [cited 2022 Feb  
17 3];5(3):E682-9. Available from: <https://www.cmajopen.ca/content/5/3/E682>  
18
- 19 28. Arnold M, Rutherford MJ, Bardot A, Ferlay J, Andersson TML, Myklebust TÅ, et al. Progress in  
20 cancer survival, mortality, and incidence in seven high-income countries 1995-2014 (ICBP  
21 SURVMARK-2): a population-based study. *Lancet Oncol* [Internet]. 2019 Nov 1 [cited 2022 Feb  
22 3];20(11):1493-505. Available from:  
23 <http://www.thelancet.com/article/S1470204519304565/fulltext>  
24
- 25 29. Chen-See S. Disruption of cancer care in Canada during COVID-19. *Lancet Oncol* [Internet].  
26 2020 Aug 1 [cited 2021 Apr 12];21(8):e374. Available from: [www.thelancet.com/oncology](http://www.thelancet.com/oncology)  
27
- 28 30. Rosenbaum L. The Untold Toll — The Pandemic's Effects on Patients without Covid-19. *N Engl J*  
29 *Med* [Internet]. 2020 Jun 11 [cited 2022 Feb 2];382(24):2368-71. Available from:  
30 <https://www.nejm.org/doi/full/10.1056/NEJMms2009984>  
31
- 32 31. Massicotte V, Ivers H, Savard J. COVID-19 Pandemic Stressors and Psychological Symptoms in  
33 Breast Cancer Patients. *Curr Oncol* [Internet]. 2021 [cited 2022 Feb 2];28(1):294-300. Available  
34 from: <https://pubmed.ncbi.nlm.nih.gov/33430131/>  
35  
36  
37  
38  
39  
40  
41  
42  
43  
44  
45  
46  
47  
48  
49  
50  
51  
52  
53  
54  
55  
56  
57  
58  
59  
60

Table 1 – Summary characteristics of pre-COVID and COVID-period cancer cases

|                                             | Pre-COVID<br>(Mar 2018-Mar 2020) | COVID Period<br>(Mar 2020-Mar 2021) |
|---------------------------------------------|----------------------------------|-------------------------------------|
| <b>Breast</b>                               |                                  |                                     |
| N                                           | 964                              | 503                                 |
| Cases per 30 days                           | 39.6                             | 41.3                                |
| Age, median (IQR)                           | 63 (52-71)                       | 64 (54-73)                          |
| Sex                                         |                                  |                                     |
| Female                                      | 957 (99.3%)                      | 499 (99.2%)                         |
| Male                                        | 7 (0.7%)                         | 4 (0.8%)                            |
| Specimen                                    |                                  |                                     |
| Mastectomy                                  | 300 (31.1%)                      | 163 (32.4%)                         |
| Excision                                    | 662 (68.7%)                      | 338 (67.2%)                         |
| Other                                       | 2 (0.2%)                         | 2 (0.4%)                            |
| Neoadjuvant treatment                       | 155 (16.1%)                      | 90 (17.9%)                          |
| Recurrence                                  | 24 (2.5%)                        | 29 (5.8%)                           |
| Multiple primary tumours                    | 144 (14.9%)                      | 69 (13.7%)                          |
| <b>Colorectum</b>                           |                                  |                                     |
| N                                           | 592                              | 265                                 |
| Cases per 30 days                           | 24.3                             | 21.8                                |
| Age, median (IQR)                           | 71 (61-78)                       | 70 (60-78)                          |
| Sex                                         |                                  |                                     |
| Female                                      | 258 (43.6%)                      | 113 (42.6%)                         |
| Male                                        | 334 (56.4%)                      | 152 (57.4%)                         |
| Specimen                                    |                                  |                                     |
| Right colon                                 | 251 (42.4%)                      | 116 (43.8%)                         |
| Left colon                                  | 78 (13.2%)                       | 33 (12.5%)                          |
| Rectal                                      | 225 (38.0%)                      | 100 (37.7%)                         |
| Subtotal/total colectomy or proctocolectomy | 28 (4.7%)                        | 11 (4.2%)                           |
| Other                                       | 10 (1.7%)                        | 5 (1.9%)                            |
| Neoadjuvant treatment                       | 132 (22.3%)                      | 69 (26.0%)                          |
| Recurrence                                  | 6 (1.0%)                         | 3 (1.1%)                            |
| Multiple primary tumours                    | 19 (3.2%)                        | 7 (2.6%)                            |
| <b>Prostate</b>                             |                                  |                                     |
| N                                           | 449                              | 165                                 |
| Cases per 30 days                           | 18.5                             | 13.6                                |
| Age, median (IQR)                           | 65 (59-68)                       | 64 (59-68)                          |
| Specimen                                    |                                  |                                     |
| Radical prostatectomy                       | 405 (90.2%)                      | 141 (85.5%)                         |
| Radical cystoprostatectomy                  | 44 (9.8%)                        | 24 (14.5%)                          |
| Neoadjuvant treatment                       | 35 (7.8%)                        | 29 (17.6%)                          |
| Multifocal tumours                          | 87 (19.4%)                       | 36 (21.8%)                          |
| <b>Endometrium</b>                          |                                  |                                     |
| N                                           | 398                              | 193                                 |
| Cases per 30 days                           | 16.4                             | 15.9                                |

1  
2  
3  
4  
5  
6  
7  
8  
9  
10  
11  
12  
13  
14  
15  
16  
17  
18  
19  
20  
21  
22  
23  
24  
25  
26  
27  
28  
29  
30  
31  
32  
33  
34  
35  
36  
37  
38  
39  
40  
41  
42  
43  
44  
45  
46  
47  
48  
49  
50  
51  
52  
53  
54  
55  
56  
57  
58  
59  
60

|                                  |             |             |
|----------------------------------|-------------|-------------|
| Age, median (IQR)                | 65 (59-72)  | 66 (58-72)  |
| Specimen                         |             |             |
| Hysterectomy Type                |             |             |
| Simple/Total                     | 393 (98.7%) | 190 (98.4%) |
| Other                            | 5 (1.3%)    | 3 (1.6%)    |
| NA                               | 1           | 0           |
| Bilateral salpingo-oophorectomy  | 369 (92.7%) | 180 (93.3%) |
| <Bilateral salpingo-oophorectomy | 16 (4.0%)   | 8 (4.1%)    |
| Omentectomy                      | 96 (24.1%)  | 46 (23.8%)  |
| Neoadjuvant treatment            | 7 (1.8%)    | 3 (1.6%)    |
| <b>Lung</b>                      |             |             |
| N                                | 386         | 140         |
| Cases per 30 days                | 15.9        | 11.5        |
| Age, median (IQR)                | 69 (63-75)  | 71 (66-76)  |
| Sex                              |             |             |
| Male                             | 137 (35.5%) | 63 (45.0%)  |
| Female                           | 249 (64.5%) | 77 (55%)    |
| Specimen                         |             |             |
| Lobectomy                        | 231 (59.8%) | 80 (57.1%)  |
| Wedge resection                  | 89 (23.1%)  | 34 (24.3%)  |
| Segmentectomy                    | 15 (3.9%)   | 9 (6.4%)    |
| Other                            | 51 (13.2%)  | 17 (12.1%)  |
| Neoadjuvant treatment            | 12 (3.1%)   | 9 (6.4%)    |
| Recurrence                       | 1 (0.3%)    | 2 (1.4%)    |
| Multiple primary tumours         | 23 (6.0%)   | 12 (8.6%)   |

Table 2 – Univariate analysis comparing demographics, pathologic features, and stage between pre-COVID and COVID-period breast cancers

|                                 | Pre-COVID<br>(Mar 2018-Mar 2020) | COVID Period<br>(Mar 2020-Mar 2021) | p-value |
|---------------------------------|----------------------------------|-------------------------------------|---------|
| n                               | 788                              | 387                                 |         |
| Cases per 30 days               | 32.4                             | 31.8                                |         |
| Age, median (IQR)               | 64 (54-72)                       | 65 (55-73)                          | 0.143   |
| Sex                             |                                  |                                     |         |
| Female                          | 782 (99.2%)                      | 383 (99.0%)                         | 0.737   |
| Male                            | 6 (0.8%)                         | 4 (1.0%)                            |         |
| Screen                          |                                  |                                     |         |
| No                              | 462 (59.2%)                      | 243 (62.8%)                         | 0.236   |
| Yes                             | 319 (40.8%)                      | 143 (37.0%)                         |         |
| NA                              | 7                                | 1                                   |         |
| Histologic Subtype              |                                  |                                     |         |
| Ductal                          | 559 (71.1%)                      | 273 (70.9%)                         | 0.282   |
| Lobular                         | 136 (17.3%)                      | 60 (15.6%)                          |         |
| Mucinous                        | 31 (3.9%)                        | 12 (3.1%)                           |         |
| Other                           | 60 (7.6%)                        | 40 (10.4%)                          |         |
| NA                              | 2                                | 2                                   |         |
| Grade                           |                                  |                                     |         |
| 1                               | 189 (24.2%)                      | 97 (25.5%)                          | 0.236   |
| 2                               | 369 (47.3%)                      | 191 (50.1%)                         |         |
| 3                               | 222 (28.5%)                      | 93 (24.4%)                          |         |
| NA                              | 8                                | 6                                   |         |
| Lymphovascular Invasion         | 142 (18.0%)                      | 65 (16.8%)                          | 0.663   |
| Hormone Status                  |                                  |                                     |         |
| Other                           | 686 (87.4%)                      | 342 (88.4%)                         | 0.616   |
| HER2-Overexpressed              | 39 (5.0%)                        | 19 (4.9%)                           |         |
| Triple-Negative                 | 60 (7.6%)                        | 26 (6.7%)                           |         |
| NA                              | 3                                | 0 (0%)                              |         |
| Positive Margin                 | 72 (9.1%)                        | 39 (10.1%)                          | 0.680   |
| Extensive intraductal component | 78 (9.9%)                        | 40 (10.3%)                          | 0.896   |
| Stage                           |                                  |                                     |         |
| I                               | 420 (53.5%)                      | 199 (51.7%)                         | 0.593   |
| II                              | 283 (36.1%)                      | 145 (37.7%)                         |         |
| III                             | 82 (10.4%)                       | 41 (10.6%)                          |         |
| NA                              | 3                                | 2                                   |         |

Table 3 – Univariate analysis comparing demographics, pathologic features, and stage between pre-COVID and COVID-period colorectal cancers

|                                 | Pre-COVID<br>(Mar 2018-Mar 2020) | COVID Period<br>(Mar 2020-Mar 2021) | p-value |
|---------------------------------|----------------------------------|-------------------------------------|---------|
| n                               | 455                              | 193                                 |         |
| Cases per 30 days               | 18.7                             | 15.9                                |         |
| Age, median (IQR)               | 72 (64-80)                       | 73 (61-79)                          | 0.891   |
| Sex                             |                                  |                                     |         |
| Female                          | 204 (44.8%)                      | 90 (46.6%)                          | 0.738   |
| Male                            | 251 (55.2%)                      | 103 (53.4%)                         |         |
| Screen                          |                                  |                                     |         |
| No                              | 376 (83.2%)                      | 167 (87.0%)                         | 0.275   |
| Yes                             | 76 (16.8%)                       | 25 (13.0%)                          |         |
| NA                              | 3                                | 1                                   |         |
| Histologic Subtype              |                                  |                                     |         |
| Adenocarcinoma                  | 357 (78.6%)                      | 152 (78.8%)                         | 0.446   |
| Mucinous adenocarcinoma         | 42 (9.3%)                        | 13 (6.7%)                           |         |
| Other                           | 55 (12.1%)                       | 28 (14.5%)                          |         |
| NA                              | 1                                | 0                                   |         |
| Tumour size in cm, median (IQR) | 4.5 (3.0-6.0)                    | 4.3 (3.3-6.0)                       | 0.712   |
| Lymphovascular invasion         | 247 (54.3%)                      | 110 (57.0%)                         | 0.584   |
| Perineural invasion             | 113 (24.8%)                      | 50 (25.9%)                          | 0.851   |
| Positive margin                 | 57 (12.5%)                       | 19 (9.8%)                           | 0.403   |
| Tumour perforation              | 16 (3.5%)                        | 8 (4.1%)                            | 0.657   |
| Stage                           |                                  |                                     |         |
| I                               | 102 (22.5%)                      | 35 (18.1%)                          | 0.174   |
| II                              | 164 (36.2%)                      | 66 (34.2%)                          |         |
| III                             | 150 (33.1%)                      | 79 (40.9%)                          |         |
| IV                              | 37 (8.2%)                        | 13 (6.7%)                           |         |
| NA                              | 2                                | 0                                   |         |

Table 4 – Univariate analysis comparing demographics, pathologic features, and stage between pre-COVID and COVID-period endometrial cancers

|                                       | Pre-COVID<br>(Mar 2018-Mar 2020) | COVID Period<br>(Mar 2020-Mar 2021) | p-value |
|---------------------------------------|----------------------------------|-------------------------------------|---------|
| n                                     | 391                              | 190                                 |         |
| Cases per 30 days                     | 16.1                             | 15.6                                |         |
| Age, median (IQR)                     | 65 (59-72)                       | 66 (58-72)                          | 0.785   |
| Histologic Subtype                    |                                  |                                     |         |
| Endometrioid carcinoma, NOS           | 244 (62.4%)                      | 112 (58.9%)                         | 0.613   |
| Endometrioid carcinoma, other variant | 56 (14.3%)                       | 31 (16.3%)                          |         |
| High-grade histologic subtype         | 88 (22.5%)                       | 47 (24.7%)                          |         |
| Other                                 | 3 (0.8%)                         | 0                                   |         |
| Histologic Grade                      |                                  |                                     |         |
| Low                                   | 272 (69.6%)                      | 125 (65.8%)                         | 0.411   |
| High                                  | 119 (30.4%)                      | 65 (34.2%)                          |         |
| Lymphovascular invasion               | 115 (29.4%)                      | 64 (33.7%)                          | 0.342   |
| Positive margin                       | 6 (1.5%)                         | 3 (1.6%)                            | 1       |
| Stage                                 |                                  |                                     |         |
| I                                     | 289 (73.9%)                      | 145 (76.3%)                         | 0.628   |
| II                                    | 38 (9.7%)                        | 13 (6.8%)                           |         |
| III+IV*                               | 64 (16.4%)                       | 32 (16.8%)                          |         |

\*Grouped due to n<10 for stage IV cases

Table 5 – Univariate analysis comparing demographics, pathologic features, and stage between pre-COVID and COVID-period prostate cancers

|                                           | Pre-COVID<br>(Mar 2018-Mar 2020) | COVID Period<br>(Mar 2020-Mar 2021) | p-value |
|-------------------------------------------|----------------------------------|-------------------------------------|---------|
| n                                         | 372                              | 113                                 |         |
| Cases per 30 days                         | 15.3                             | 9.3                                 |         |
| Age, median (IQR)                         | 64 (59-68)                       | 63 (58-67)                          | 0.411   |
| Histologic Subtype                        |                                  |                                     |         |
| Acinar adenocarcinoma                     | 349                              | 109                                 | 0.355   |
| Acinar adenocarcinoma with mixed features | 23                               | 4                                   |         |
| Gleason Grade Group*                      |                                  |                                     |         |
| 1+2                                       | 274 (73.7%)                      | 79 (69.9%)                          | 0.508   |
| 3-5                                       | 98 (26.3%)                       | 34 (30.1%)                          |         |
| Intraductal carcinoma                     | 102 (27.4%)                      | 37 (32.7%)                          | 0.328   |
| Lymphovascular invasion                   | 34 (9.1%)                        | 14 (12.4%)                          | 0.405   |
| Perineural invasion                       | 329 (88.4%)                      | 105 (92.9%)                         | 0.236   |
| Margin status                             |                                  |                                     |         |
| Negative                                  | 249 (66.9%)                      | 73 (64.6%)                          | 0.918   |
| Limited pos                               | 59 (15.9%)                       | 25 (22.1%)                          |         |
| Non-limited pos                           | 64 (17.2%)                       | 15 (13.3%)                          |         |
| Stage†                                    |                                  |                                     |         |
| I+II                                      | 161 (43.3%)                      | 44 (38.9%)                          | 0.374   |
| III                                       | 184 (49.5%)                      | 59 (52.2%)                          |         |
| IV                                        | 27 (7.3%)                        | 10 (8.8%)                           |         |

\*Grouped due to n<10 for Gleason grade groups 1, 4 and 5

†Grouped due to n<10 for Stage I cases

Table 6 – Univariate analysis comparing demographics, pathologic features, and stage between pre-COVID and COVID-period lung cancers

|                         | Pre-COVID<br>(Mar 2018-Mar 2020) | COVID Period<br>(Mar 2020-Mar 2021) | p-value |
|-------------------------|----------------------------------|-------------------------------------|---------|
| n                       | 373                              | 129                                 |         |
| Cases per 30 days       | 15.3                             | 10.6                                |         |
| Age, median (IQR)       | 70 (63-75)                       | 71 (64-76)                          | 0.396   |
| Sex                     |                                  |                                     |         |
| Female                  | 240 (64.3%)                      | 73 (56.6%)                          | 0.144   |
| Male                    | 133 (35.7%)                      | 56 (43.4%)                          |         |
| Histologic Type         |                                  |                                     |         |
| Adenocarcinoma          | 236 (63.3%)                      | 89 (69.0%)                          | 0.316   |
| Squamous cell carcinoma | 70 (18.8%)                       | 25 (19.4%)                          |         |
| Carcinoid               | 36 (9.7%)                        | 6 (4.7%)                            |         |
| Other                   | 31 (8.3%)                        | 9 (7.0%)                            |         |
| Lymphovascular invasion | 57 (15.3%)                       | 28 (21.7%)                          | 0.123   |
| Positive Margin         | 18 (4.8%)                        | 5 (3.9%)                            | 0.809   |
| Stage                   |                                  |                                     |         |
| I                       | 239 (65.1%)                      | 83 (64.3%)                          | 0.904   |
| II                      | 72 (19.6%)                       | 31 (24.0%)                          |         |
| III+IV*                 | 56 (15.3%)                       | 15 (11.6%)                          |         |
| Not applicable          | 6                                | 0                                   |         |

\*Grouped due to n<10 for stage IV cases

Table 7 – Multivariate ordinal regression for pathological cancer stage

|                                 | OR     | 95% CI       | p-value |
|---------------------------------|--------|--------------|---------|
| <b>Breast (n = 1150)</b>        |        |              |         |
| COVID Period                    | 1.071  | 0.826-1.388  | 0.603   |
| Age                             | 1.009  | 1.000-1.019  | 0.050   |
| Screen-detected                 | 0.246  | 0.186-0.324  | <0.001  |
| Grade                           | 2.308  | 1.756-3.044  | <0.001  |
| Lymphovascular Invasion         | 5.522  | 3.968- 7.730 | <0.001  |
| High-risk hormone status        | 1.102  | 0.791-1.531  | 0.562   |
| Extensive intraductal component | 0.890  | 0.573-1.365  | 0.596   |
| Positive margin                 | 1.351  | 0.901-2.017  | 0.143   |
| <b>Colorectal (n = 638)</b>     |        |              |         |
| COVID Period                    | 1.201  | 0.869-1.661  | 0.268   |
| Age                             | 0.996  | 0.984-1.008  | 0.518   |
| Sex (male)                      | 1.119  | 0.828-1.512  | 0.465   |
| Screen-detected                 | 0.398  | 0.254-0.618  | <0.001  |
| Tumour size                     | 1.178  | 1.105-1.259  | <0.001  |
| Lymphovascular invasion         | 3.799  | 2.731-5.314  | <0.001  |
| Perineural invasion             | 2.383  | 1.628-3.506  | <0.001  |
| Positive margin                 | 3.764  | 2.261-6.334  | <0.001  |
| <b>Endometrium (n = 572)</b>    |        |              |         |
| COVID Period                    | 0.792  | 0.495-1.252  | 0.324   |
| Age                             | 1.002  | 0.980-1.025  | 0.835   |
| High Grade                      | 4.922  | 3.173-7.700  | <0.001  |
| Lymphovascular Invasion         | 5.729  | 3.714-8.915  | <0.001  |
| <b>Prostate (n = 485)</b>       |        |              |         |
| COVID Period                    | 1.171  | 0.765-1.794  | 0.603   |
| Age                             | 1.027  | 0.997-1.058  | 0.118   |
| High Gleason Grade (3-5)        | 2.736  | 1.687-4.510  | <0.001  |
| Intraductal Carcinoma           | 2.744  | 1.795-4.243  | 0.001   |
| Lymphovascular Invasion         | 17.849 | 8.423-39.749 | <0.001  |
| Positive margin                 | 1.778  | 1.239-2.576  | 0.009   |
| <b>Lung (n = 496)</b>           |        |              |         |
| COVID Period                    | 0.826  | 0.535-1.262  | 0.383   |
| Age                             | 1.003  | 0.984-1.023  | 0.788   |
| Sex (male)                      | 1.888  | 1.292-2.761  | 0.001   |
| Lymphovascular invasion         | 4.310  | 2.730-6.829  | <0.001  |

STROBE Statement—Checklist of items that should be included in reports of *cohort studies*

|                              | Item No | Recommendation                                                                                                                                                                                                                                                                                                         | Page No |
|------------------------------|---------|------------------------------------------------------------------------------------------------------------------------------------------------------------------------------------------------------------------------------------------------------------------------------------------------------------------------|---------|
| <b>Title and abstract</b>    | 1       | (a) Indicate the study's design with a commonly used term in the title or the abstract                                                                                                                                                                                                                                 | 2       |
|                              |         | (b) Provide in the abstract an informative and balanced summary of what was done and what was found                                                                                                                                                                                                                    | 3       |
| <b>Introduction</b>          |         |                                                                                                                                                                                                                                                                                                                        |         |
| Background/rationale         | 2       | Explain the scientific background and rationale for the investigation being reported                                                                                                                                                                                                                                   | 4       |
| Objectives                   | 3       | State specific objectives, including any prespecified hypotheses                                                                                                                                                                                                                                                       | 4       |
| <b>Methods</b>               |         |                                                                                                                                                                                                                                                                                                                        |         |
| Study design                 | 4       | Present key elements of study design early in the paper                                                                                                                                                                                                                                                                | 4-5     |
| Setting                      | 5       | Describe the setting, locations, and relevant dates, including periods of recruitment, exposure, follow-up, and data collection                                                                                                                                                                                        | 4-5     |
| Participants                 | 6       | (a) Give the eligibility criteria, and the sources and methods of selection of participants. Describe methods of follow-up<br>(b) For matched studies, give matching criteria and number of exposed and unexposed                                                                                                      | 5       |
| Variables                    | 7       | Clearly define all outcomes, exposures, predictors, potential confounders, and effect modifiers. Give diagnostic criteria, if applicable                                                                                                                                                                               | 5       |
| Data sources/<br>measurement | 8*      | For each variable of interest, give sources of data and details of methods of assessment (measurement). Describe comparability of assessment methods if there is more than one group                                                                                                                                   | 5-6     |
| Bias                         | 9       | Describe any efforts to address potential sources of bias                                                                                                                                                                                                                                                              | NA      |
| Study size                   | 10      | Explain how the study size was arrived at                                                                                                                                                                                                                                                                              | 5       |
| Quantitative variables       | 11      | Explain how quantitative variables were handled in the analyses. If applicable, describe which groupings were chosen and why                                                                                                                                                                                           | 5-6     |
| Statistical methods          | 12      | (a) Describe all statistical methods, including those used to control for confounding<br>(b) Describe any methods used to examine subgroups and interactions<br>(c) Explain how missing data were addressed<br>(d) If applicable, explain how loss to follow-up was addressed<br>(e) Describe any sensitivity analyses | 6       |
| <b>Results</b>               |         |                                                                                                                                                                                                                                                                                                                        |         |
| Participants                 | 13*     | (a) Report numbers of individuals at each stage of study—eg numbers potentially eligible, examined for eligibility, confirmed eligible, included in the study, completing follow-up, and analysed<br>(b) Give reasons for non-participation at each stage<br>(c) Consider use of a flow diagram                        | 7,14-21 |
| Descriptive data             | 14*     | (a) Give characteristics of study participants (eg demographic, clinical, social) and information on exposures and potential confounders<br>(b) Indicate number of participants with missing data for each variable of interest<br>(c) Summarise follow-up time (eg, average and total amount)                         | 14-20   |
| Outcome data                 | 15*     | Report numbers of outcome events or summary measures over time                                                                                                                                                                                                                                                         | 16-20   |

|    |                          |    |                                                                                                                                                                                                              |         |
|----|--------------------------|----|--------------------------------------------------------------------------------------------------------------------------------------------------------------------------------------------------------------|---------|
| 1  | Main results             | 16 | (a) Give unadjusted estimates and, if applicable, confounder-adjusted estimates and their precision (eg, 95% confidence interval). Make clear which confounders were adjusted for and why they were included | 7,14-21 |
| 2  |                          |    |                                                                                                                                                                                                              |         |
| 3  |                          |    | (b) Report category boundaries when continuous variables were categorized                                                                                                                                    |         |
| 4  |                          |    | (c) If relevant, consider translating estimates of relative risk into absolute risk for a meaningful time period                                                                                             |         |
| 5  | Other analyses           | 17 | Report other analyses done—eg analyses of subgroups and interactions, and sensitivity analyses                                                                                                               | NA      |
| 6  | <b>Discussion</b>        |    |                                                                                                                                                                                                              |         |
| 7  | Key results              | 18 | Summarise key results with reference to study objectives                                                                                                                                                     | 7-8     |
| 8  | Limitations              | 19 | Discuss limitations of the study, taking into account sources of potential bias or imprecision. Discuss both direction and magnitude of any potential bias                                                   | 9-10    |
| 9  | Interpretation           | 20 | Give a cautious overall interpretation of results considering objectives, limitations, multiplicity of analyses, results from similar studies, and other relevant evidence                                   | 7-10    |
| 10 | Generalisability         | 21 | Discuss the generalisability (external validity) of the study results                                                                                                                                        | NA      |
| 11 | <b>Other information</b> |    |                                                                                                                                                                                                              |         |
| 12 | Funding                  | 22 | Give the source of funding and the role of the funders for the present study and, if applicable, for the original study on which the present article is based                                                | 2       |

\*Give information separately for exposed and unexposed groups.

**Note:** An Explanation and Elaboration article discusses each checklist item and gives methodological background and published examples of transparent reporting. The STROBE checklist is best used in conjunction with this article (freely available on the Web sites of PLoS Medicine at <http://www.plosmedicine.org/>, Annals of Internal Medicine at <http://www.annals.org/>, and Epidemiology at <http://www.epidem.com/>). Information on the STROBE Initiative is available at <http://www.strobe-statement.org>.
